# Supplementary material for: Electrocatalytic hydrogen evolution of MOF-derived materials based on conjugated or unconjugated ligands
Source: Royal Society of Chemistry journal article supplement (doi:10.1039/d3ce00829k), 2023-12-11
Supplement: d3ce00829k1.pdf [file d3ce00829k1.pdf]

# Electrocatalytic hydrogen evolution of MOFs derived materials based on conjugated or unconjugated ligands

Chun-Pu Duan<sup>a</sup>, Ya-Lu Ni<sup>a</sup>, Xu-Dong Yang<sup>a</sup>, Jing-Yu Huang<sup>a</sup>, Yong-Hui Shen<sup>b</sup>, Xun-Gang Gu<sup>b</sup>, Gang Ni<sup>a</sup>, Miao-Lian Ma<sup>a</sup>, Juan Li<sup>a</sup>, Ling Qin<sup>\*,a</sup>

## Single-crystal structure determination

Crystallographic data were collected on a Bruker Apex Smart CCD diffractometer with graphite-monochromated Mo-K $\alpha$  radiation ( $\lambda = 0.71073 \text{ \AA}$ ) at 293 K adopting the  $\omega$ -scan technique. Using the SAINT program integrated the intensity data. An empirical absorption correction was applied using the SADABS program. The structure was solved by direct methods and refined anisotropically using full-matrix least-squares procedures based on  $F^2$  values with the SHELXTL-97 package of crystallographic software. The hydrogen atoms were generated geometrically. Crystallographic data of complex **1** are presented in Reference, the selected bond lengths and angles are given in Table S1. The CCDC reference number is 2269367-2269368 for Co-PDS-TDC and Co-BPT-TDC.

**Table S1.** Crystallographic data and structure refinement details.

| Crystal                                         | Co-BPT-TDC                  | Co-PDS-TDC                  |
|-------------------------------------------------|-----------------------------|-----------------------------|
| Formula                                         | $C_{36}H_{20}Co_2N_8O_8S_4$ | $C_{32}H_{22}Co_2N_4O_9S_6$ |
| Formula Weight                                  | 938.70                      | 916.76                      |
| Crystal System                                  | monoclinic                  | orthorhombic                |
| Space group                                     | $P2_{1/c}$                  | $C2_22_1$                   |
| a                                               | 15.156(3)                   | 16.8320(14)                 |
| b                                               | 18.378(2)                   | 14.5894(16)                 |
| c                                               | 15.9626(18)                 | 23.725(3)                   |
| $\alpha$                                        | 90                          | 90                          |
| $\beta$                                         | 91.834(12)                  | 90                          |
| $\gamma$                                        | 90                          | 90                          |
| V                                               | 4443.9(11)                  | 5826.1(11)                  |
| Z                                               | 4                           | 4                           |
| D(calc) [g/cm <sup>3</sup> ]                    | 1.403                       | 1.045                       |
| Mu (MoKa) [ /mm ]                               | 0.989                       | 0.821                       |
| F(000)                                          | 1896                        | 1856                        |
| Temperature (K)                                 | 293                         | 293                         |
| Theta Min-Max                                   | 3.4, 25.0                   | 3.4, 25.0                   |
| Tot., Uniq. Data,                               | 7788, 7788                  | 17266, 5117                 |
| R(int)                                          | 0.000                       | 0.062                       |
| Observed Data                                   | 4039                        | 4332                        |
| Nref, Npar                                      | 7788, 523                   | 1198, 97                    |
| R                                               | 0.1141                      | 0.0962                      |
| wR2                                             | 0.3041                      | 0.2921                      |
| S                                               | 1.02                        | 1.13                        |
| Max. and Av. Shift/Error                        | 0.00, 0.00                  | 0.00, 0.00                  |
| Min. and Max. Resd. Dens. [e/Ang <sup>3</sup> ] | -0.83, 3.10                 | -0.74, 1.60                 |

**Table S2** Selected bond lengths (Å) and angles (deg.)

| Crystal     |          | Co-BPT-TDC    |          |
|-------------|----------|---------------|----------|
| Co1-O1      | 2.032(6) | O5-Co1-O8_c   | 149.3(2) |
| Co1-O5      | 2.094(6) | N1-Co1-N4_b   | 175.9(3) |
| Co1-N1      | 2.104(8) | O8_c-Co1-N1   | 87.4(2)  |
| Co1-N4_b    | 2.127(9) | O5-Co1-N4_b   | 90.9(2)  |
| Co1-O8_c    | 2.024(5) | O8_c-Co1-N4_b | 88.5(2)  |
| Co2-O2      | 2.005(6) | O2-Co2-N5     | 85.9(3)  |
| Co2-N5      | 2.154(8) | O2-Co2-N8_a   | 89.4(3)  |
| Co2-N8_a    | 2.088(8) | O2-Co2-O7_c   | 117.2(2) |
| Co2-O7_c    | 2.015(6) | O2-Co2-O4_d   | 148.4(2) |
| Co2-O4_d    | 2.092(6) | N5-Co2-N8_a   | 175.1(3) |
| O1-Co1-O5   | 93.6(2)  | O7_c-Co2-N5   | 90.9(3)  |
| O1-Co1-N1   | 91.7(3)  | O4_d-Co2-N5   | 90.7(2)  |
| O1-Co1-N4_b | 90.6(3)  | O7_c-Co2-N8_a | 92.4(3)  |
| O1-Co1-O8_c | 117.1(2) | O4_d-Co2-N8_a | 92.7(2)  |
| O5-Co1-N1   | 92.3(2)  | O4_d-Co2-O7_c | 94.2(2)  |

Symmetry element:  $\mathbf{a} = -1 + x, y, z$ ;  $\mathbf{b} = 1 + x, y, z$ ;  $\mathbf{c} = x, 1/2 - y, -1/2 + z$ ;  $\mathbf{d} = x, 3/2 - y, -1/2 + z$ .

| Crystal       |          | Co-PDS-TDC    |          |
|---------------|----------|---------------|----------|
| Co1-O1        | 2.084(6) | O1-Co1-O4_c   | 88.5(3)  |
| Co1-O5        | 2.144(5) | O5-Co1-N1     | 90.7(3)  |
| Co1-N1        | 2.167(9) | O3_a-Co1-O5   | 95.8(3)  |
| Co1-O3_a      | 2.059(7) | O5-Co1-N2_b   | 174.7(2) |
| Co1-N2_b      | 2.151(9) | O4_c-Co1-O5   | 87.8(2)  |
| Co1-O4_c      | 2.086(7) | O3_a-Co1-N1   | 89.3(3)  |
| O4_c-Co1-N2_b | 87.5(3)  | N1-Co1-N2_b   | 94.0(3)  |
| O1-Co1-O5     | 90.4(2)  | O4_c-Co1-N1   | 177.9(3) |
| O1-Co1-N1     | 90.1(3)  | O3_a-Co1-N2_b | 86.8(3)  |
| O1-Co1-O3_a   | 173.8(3) | O3_a-Co1-O4_c | 92.3(3)  |
| O1-Co1-N2_b   | 87.1(3)  |               |          |

Symmetry element:  $a = -1/2 + x, 1/2 + y, z$ ;  $b = 1/2 + x, 1/2 + y, z$ ;  $c = 5/2 - x, 1/2 + y, 3/2 - z$ .

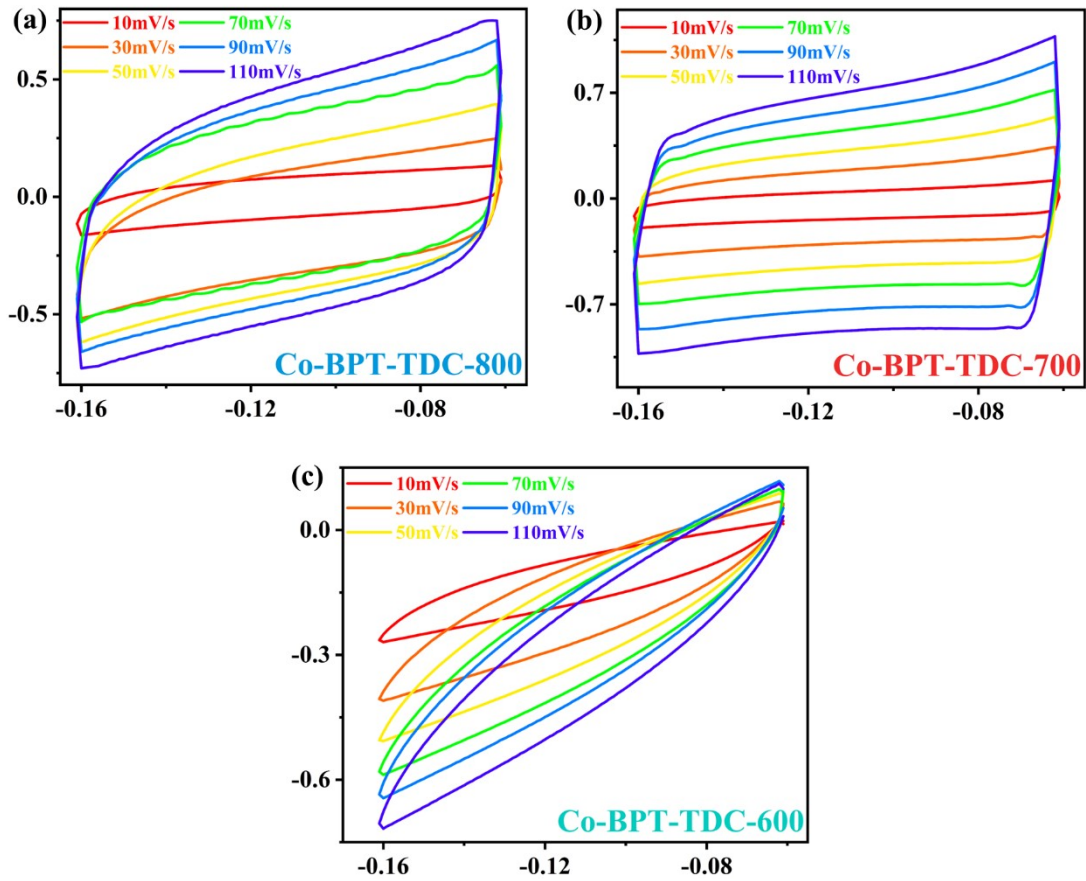

Figure S1 The CV of (a) Co-BPT-TDC-800, (b) Co-BPT-TDC-700 and (c) Co-BPT-TDC-600 with different sweep speed.

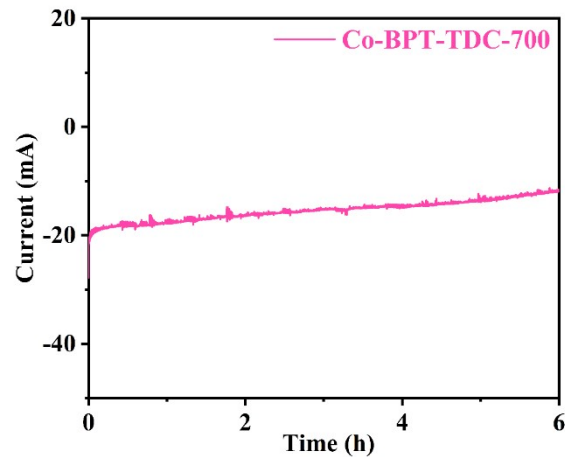

Figure S2 Co-BPT-TDC-700 sample stability test it curve.

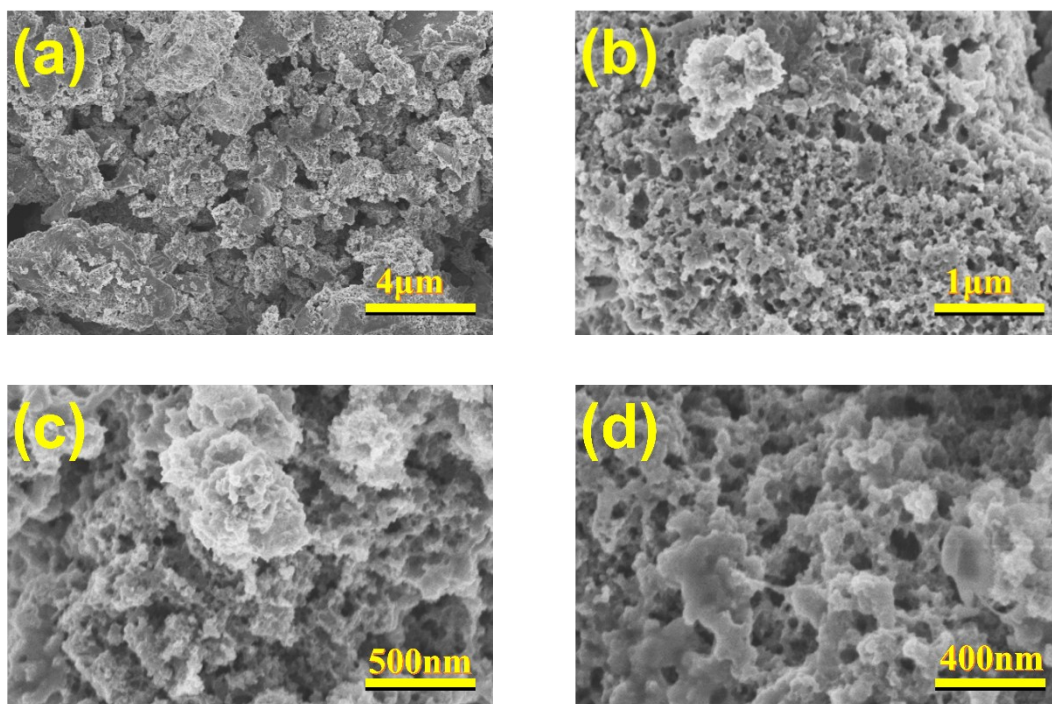

Figure S3 SEM patterns after Co-BPT-TDC-700 sample stability test.

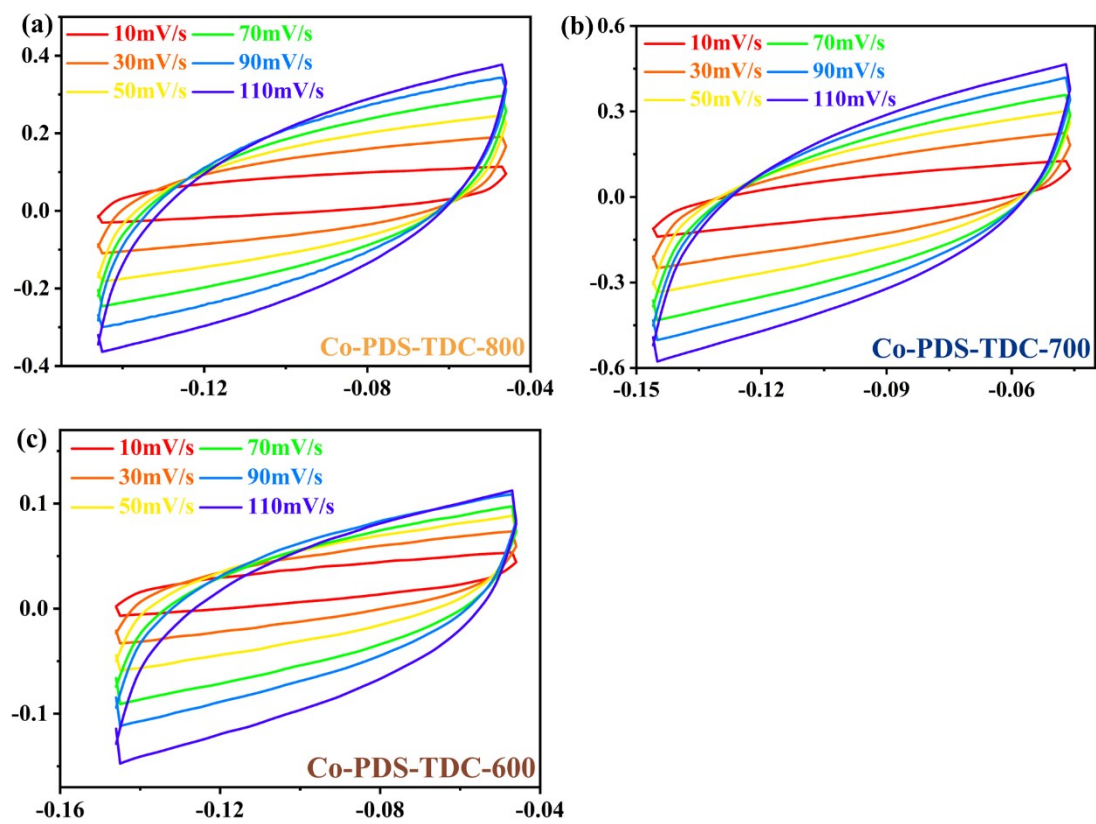

Figure S4 The CV of (a) Co-PDS-TDC-800, (b) Co-PDS-TDC-700 and (c) Co-PDS-TDC-600 with different sweep speed.
